# Supplementary material for: Fault interpretation in a vertically exaggerated seismic section: evidence of conceptual model uncertainty and anchoring
Source: Copernicus journal article supplement (doi:10.5194/se-2019-66), 2019-05-09

Thank you for taking part in this experiment. Please complete the following questions and interpret the seismic section on the other side of this page. Please interpret the main faults crossing the section as deep as you can, and a sedimentary horizon to mark the displacement if you can. Further annotation and/or sketching will be very welcomed.

**Gender** - Male  Female

**Age** - <21  21-30  31-40  41-50  51-60  61+

**Education** - No degree  Bachelors  Masters  PhD

**What subject(s) were they in?** - Geology  geophysics  maths  engineering

Other  .....

**Experience:**

**How many years of post-education geology and geophysics experience do you have? (Put a number)**

**Where do you work?**

Student  Academic  Consultancy  service company  oil company  other  .....

**Have you worked in other sectors? (Please indicate all that apply)**

Student  Academic  Consultancy  service company  oil company  other  .....

**How often do you interpret seismic image data?**

Daily  weekly  monthly  annually  less frequently  never

**How often do you process seismic data?**

Daily  weekly  monthly  annually  less frequently  never

**What best describes your experience in structural geology?**

Specialist  good working knowledge  basic working knowledge  no knowledge

**What best describes your knowledge in seismic interpretation?**

Specialist  good working knowledge  basic working knowledge  no knowledge

**Have you attended a seismic interpretation course? -- And a structural geology course?**

Yes/no Yes/ no

**Assess the following settings, from 10 (most) to 1 (least), in terms of your experience of working in these tectonic settings. Please rank all relevant.**

Compressional  extensional  inversion  salt/shale  strike-slip

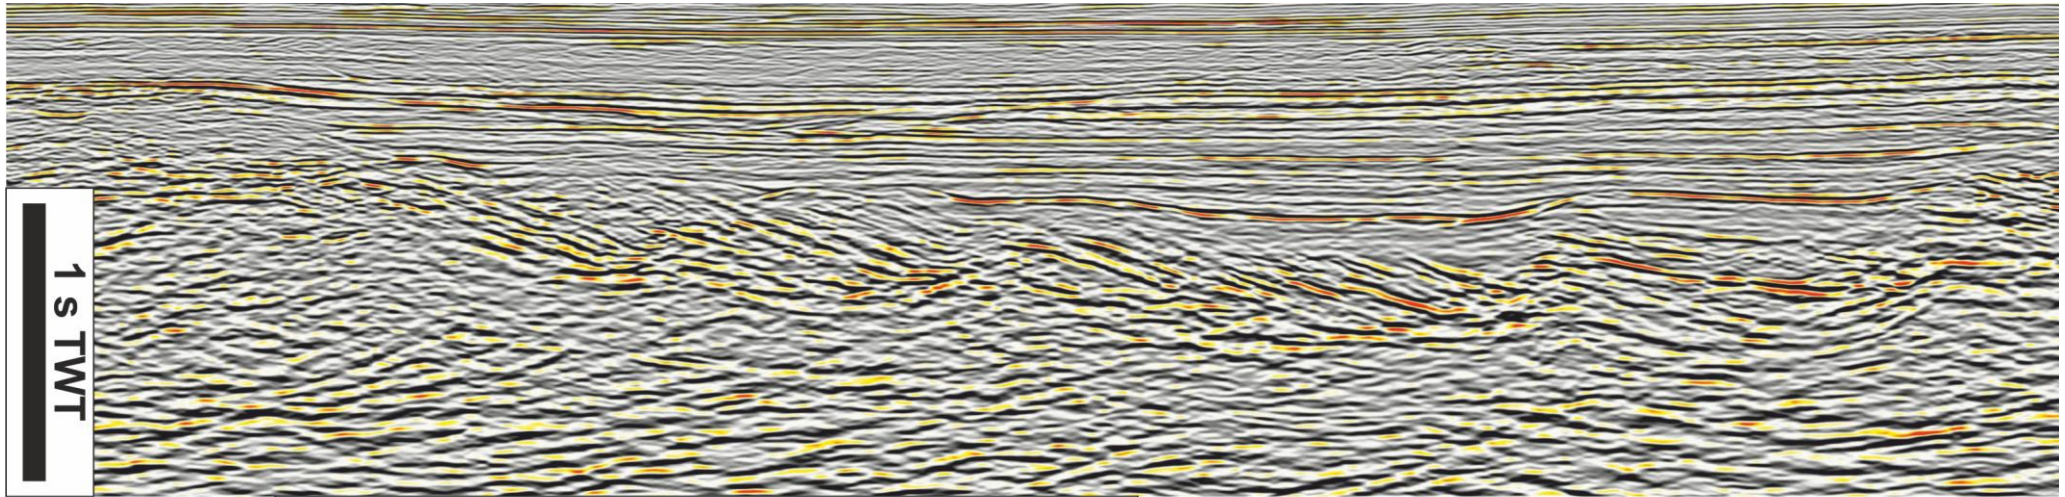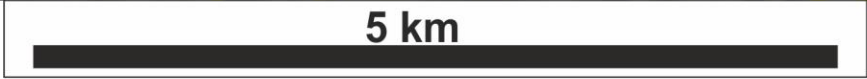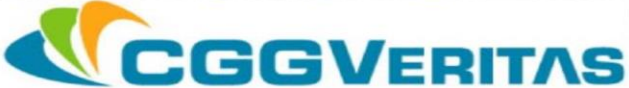

Thank you for taking part in this experiment. Please complete the following questions and interpret the seismic section on the other side of this page. Please interpret the main faults crossing the section as deep as you can, and a sedimentary horizon to mark the displacement if you can. Further annotation and/or sketching will be very welcomed.

**Gender** - Male  Female

**Age** - <21  21-30  31-40  41-50  51-60  61+

**Education** - No degree  Bachelors  Masters  PhD

**What subject(s) were they in?** - Geology  geophysics  maths  engineering

Other  .....

**Experience:**

**How many years of post-education geology and geophysics experience do you have? (Put a number)**

**Where do you work?**

Student  Academic  Consultancy  service company  oil company  other  .....

**Have you worked in other sectors? (Please indicate all that apply)**

Student  Academic  Consultancy  service company  oil company  other  .....

**How often do you interpret seismic image data?**

Daily  weekly  monthly  annually  less frequently  never

**How often do you process seismic data?**

Daily  weekly  monthly  annually  less frequently  never

**What best describes your experience in structural geology?**

Specialist  good working knowledge  basic working knowledge  no knowledge

**What best describes your knowledge in seismic interpretation?**

Specialist  good working knowledge  basic working knowledge  no knowledge

**Have you attended a seismic interpretation course? – and/or a structural geology course?**

Yes/no Yes/ no

**Assess the following settings, from 10 (most) to 1 (least), in terms of your experience of working in these tectonic settings. Please rank all relevant.**

Compressional  extensional  inversion  salt/shale  strike-slip

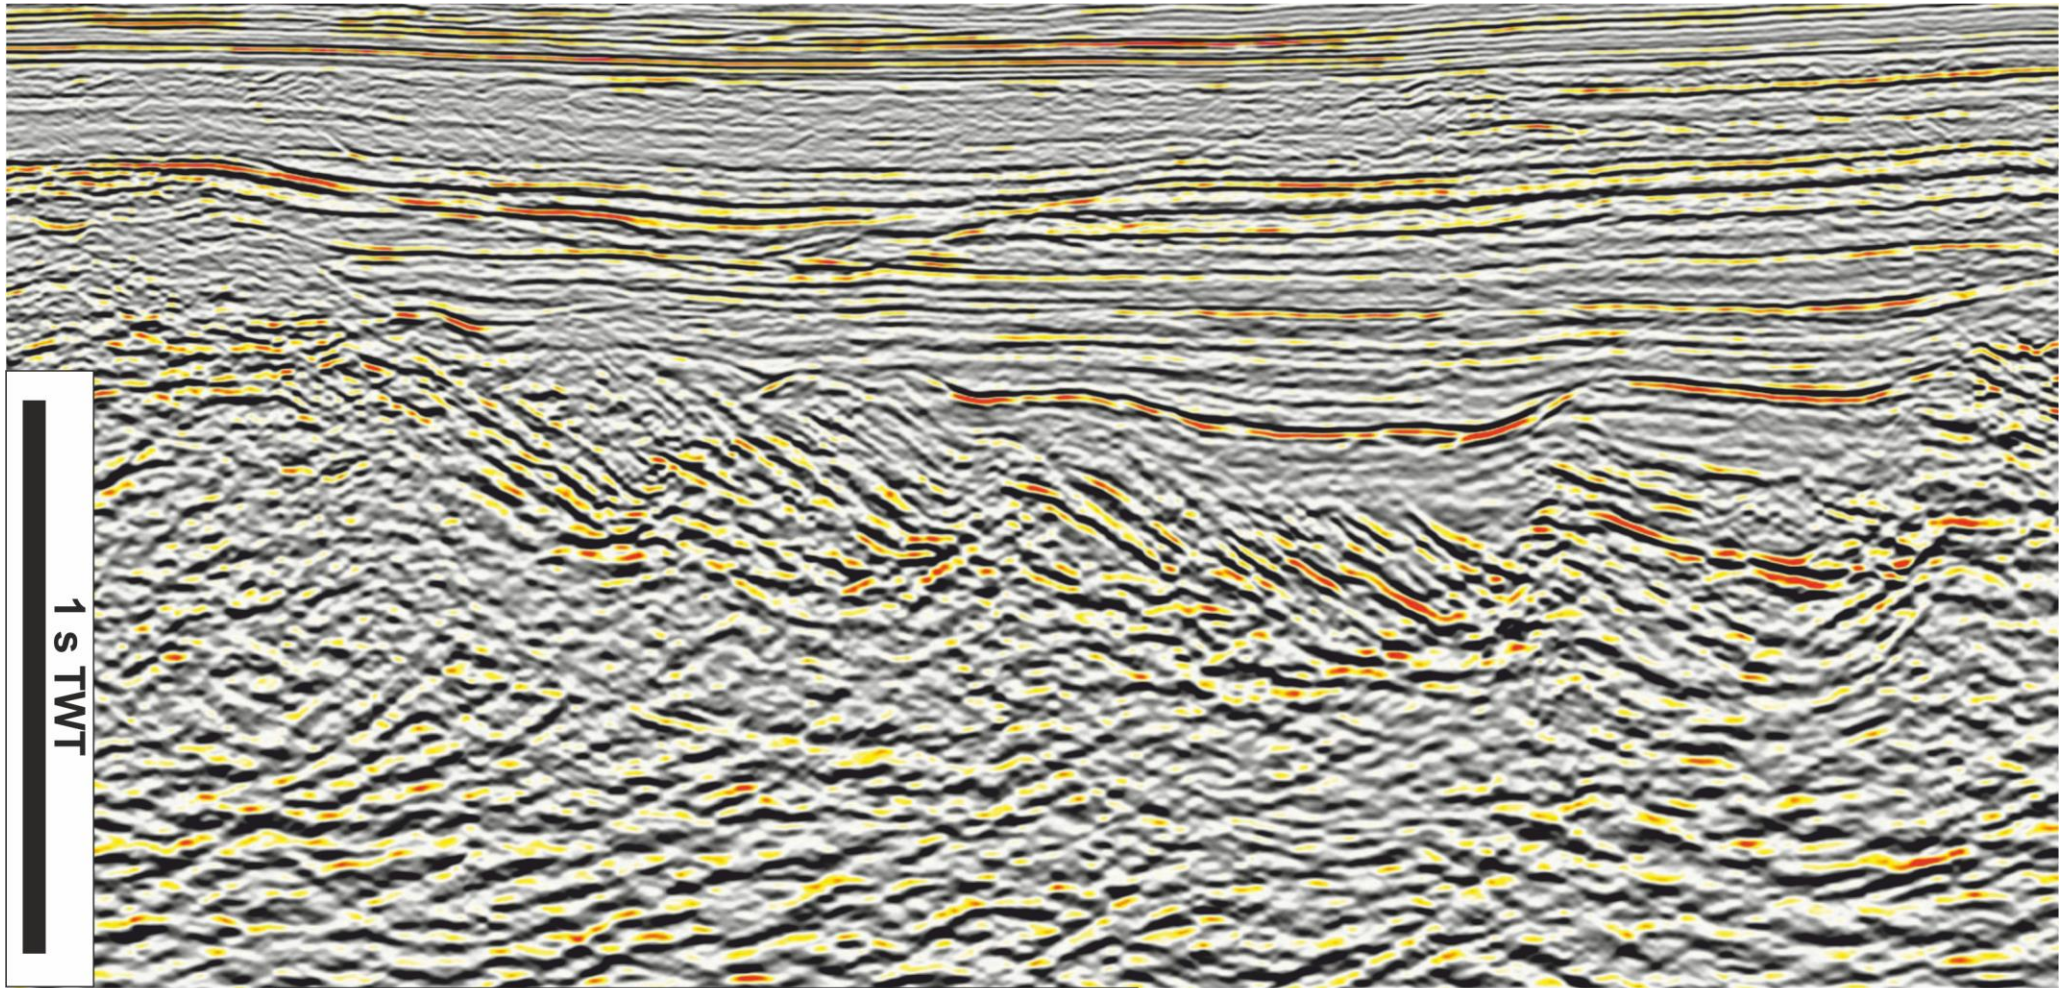

5 km

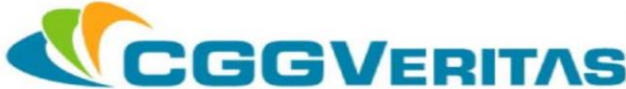

Supplement: Supplementary file 1 [file se-2019-66-supplement.pdf]
